# Supplementary material for: Improving cellular adhesion on scaffolds for transplantation: synthesising a poly(MMA-co-PEGM) network
Source: Royal Society of Chemistry journal article supplement (doi:10.1039/c3tb21248c), 2013-01-01
Supplement: c3tb21248c.pdf [file c3tb21248c.pdf]

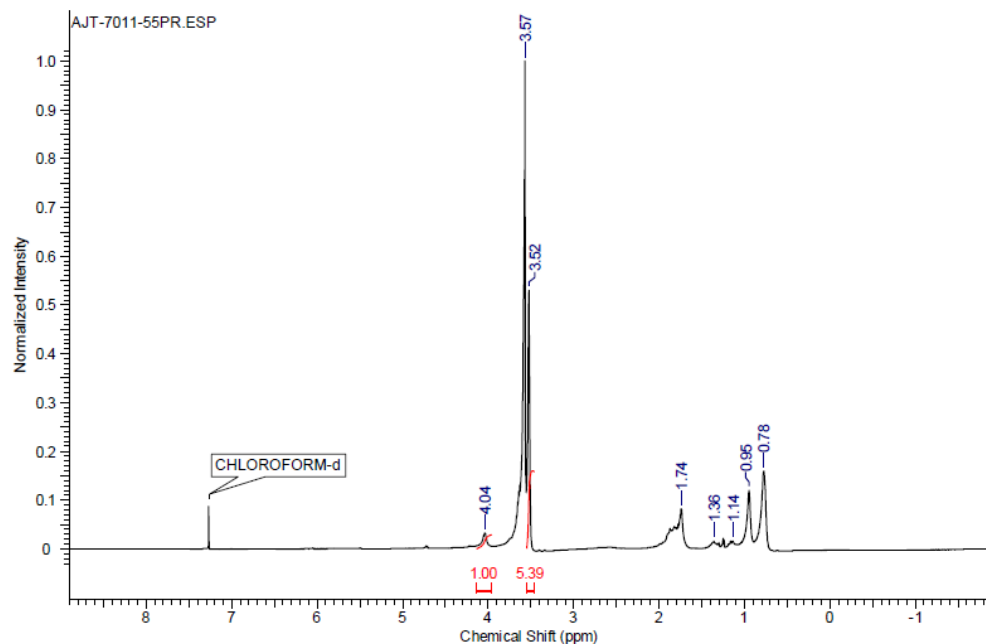

Figure S1: NMR spectrum of P(MMA-co-PEGM).

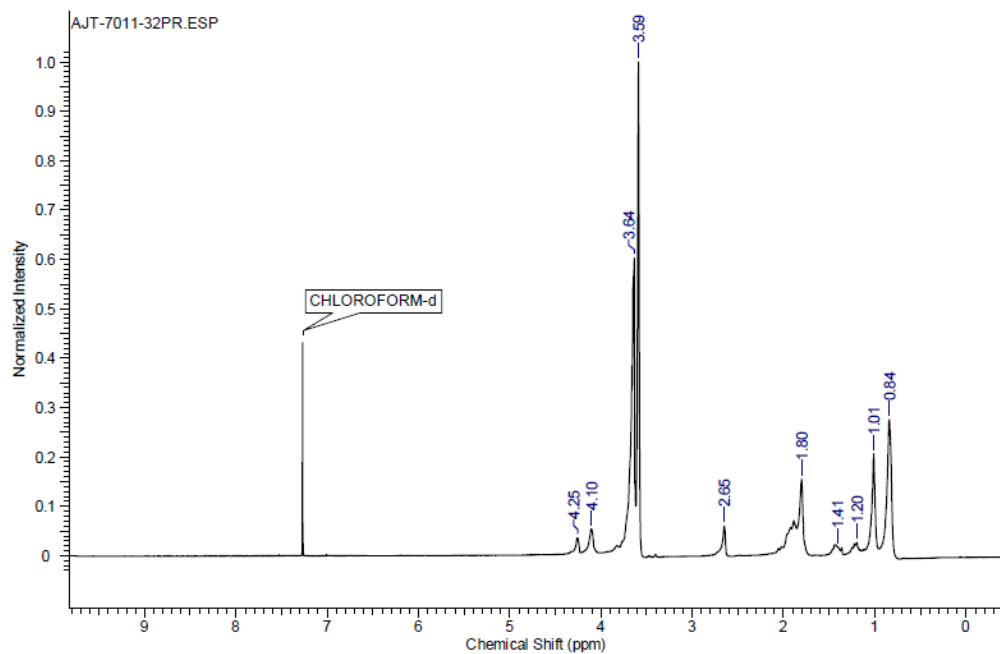

Figure S2: NMR spectrum of P(MMA-co-PEGM) following reaction with succinic anhydride.

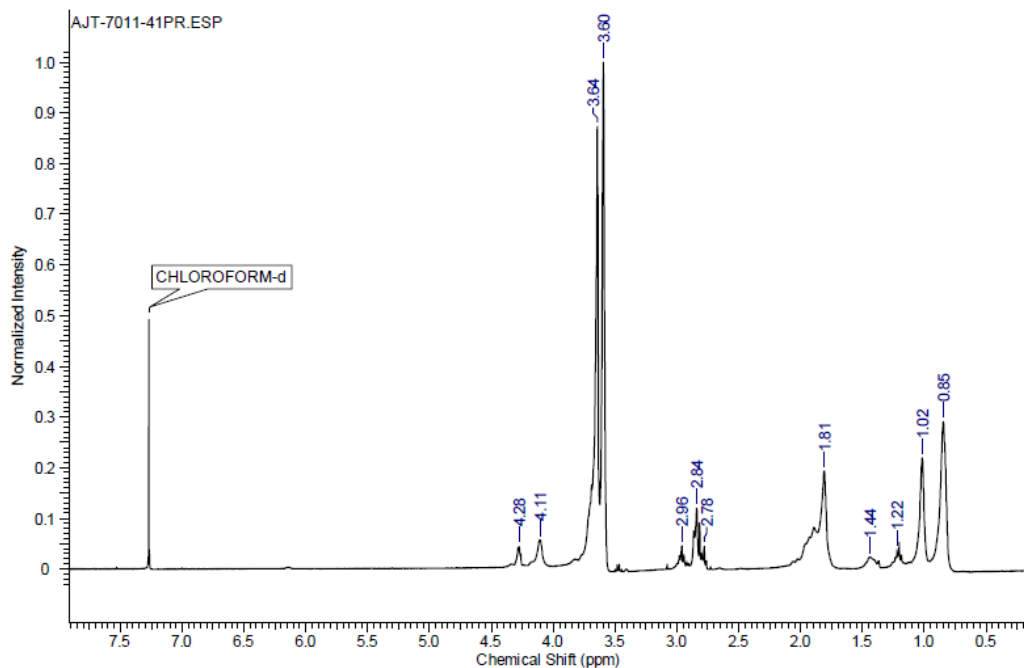

Figure S3: NMR spectrum of P(MMA-co-PEGM) with succinimidyl ester functionality.

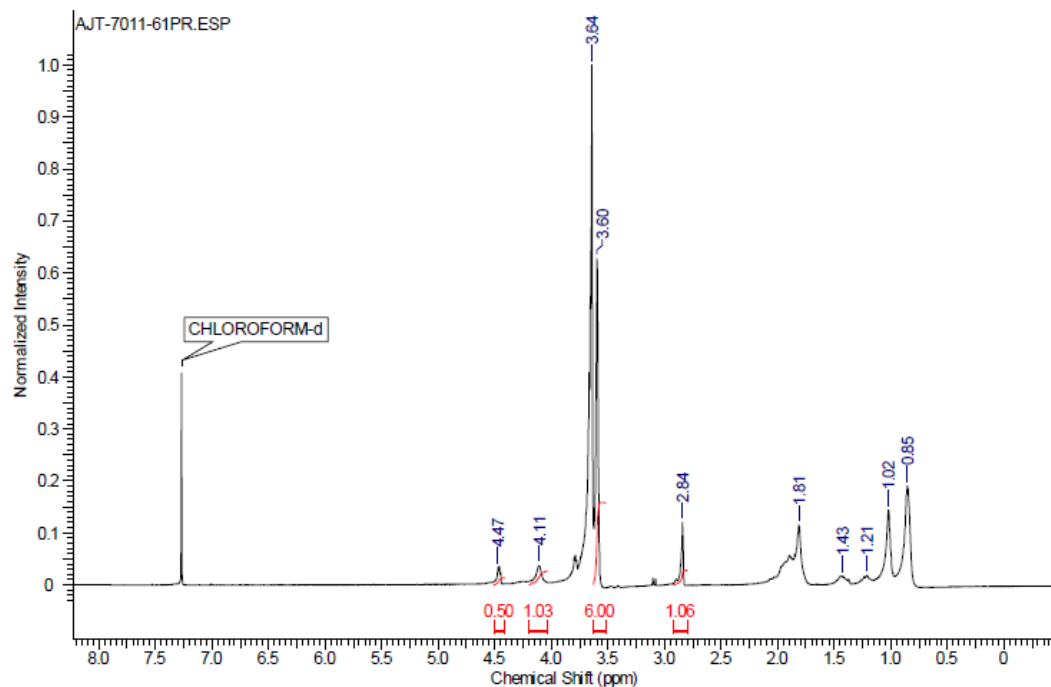

Figure S4: NMR spectrum of P(MMA-co-PEGM) with succinimidyl carbonate functionality. The appearance of peaks at  $\delta$ 2.8ppm and  $\delta$ 4.5ppm confirmed successful addition of the succinimidyl carbonate group.
